# Supplementary material for: Optimal ranking regime analysis of TreeFlow dendrohydrological reconstructions
Source: Copernicus journal article supplement (doi:10.5194/cp-11-1107-2015), 2015-08-26
Supplement: Supplementary file 1 [file cp-11-1107-2015-supplement.zip]

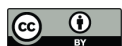

## *Supplement of*

# **Optimal ranking regime analysis of TreeFlow dendrohydrological reconstructions**

**S. A. Mauget**

*Correspondence to:* S. A. Mauget ([steven.mauget@ars.usda.gov](mailto:steven.mauget@ars.usda.gov))

- [cp-11-1107-2015-supplement-title-page.pdf](#)
- [calc\\_orr](#)
  - [CALC\\_ORR.scr](#)
  - [calc\\_orr.c](#)

The copyright of individual parts of the supplement might differ from the CC-BY 3.0 licence.
